# Supplementary material
Source: PubMed Central journal article supplement (PMC5535794)
Supplement: NIHMS881295-supplement-supplement_1.pdf [file NIHMS881295-supplement-supplement_1.pdf]

**Appendix eTable 1:** Adjusted relative ratios and 95% confidence intervals for total, pharmacy, laboratory, and radiology costs, by language and insurance group. Comparison group is privately-insured English speakers.

| Outcome, by language-insurance groups | Adjusted relative ratio <sup>a</sup> | 95% CI     | P-value |
|---------------------------------------|--------------------------------------|------------|---------|
| <b>Privately-insured Spanish</b>      |                                      |            |         |
| Total cost                            | 0.79                                 | 0.67, 0.93 | .004    |
| Pharmacy cost                         | 0.72                                 | 0.51, 1.00 | .05     |
| Lab cost                              | 0.86                                 | 0.62, 1.21 | .40     |
| Radiology cost                        | 1.03                                 | 0.61, 1.73 | .91     |
| <b>Privately-insured Other</b>        |                                      |            |         |
| Total cost                            | 1.05                                 | 0.95, 1.17 | 0.34    |
| Pharmacy cost                         | 1.14                                 | 1.00, 1.31 | .05     |
| Lab cost                              | 1.21                                 | 1.03, 1.42 | .02     |
| Radiology cost                        | 1.14                                 | 0.93, 1.41 | 1.30    |
| <b>Publicly-insured English</b>       |                                      |            |         |
| Total cost                            | 0.93                                 | 0.91, 0.96 | <.001   |
| Pharmacy cost                         | 0.90                                 | 0.86, 0.95 | <.001   |
| Lab cost                              | 0.94                                 | 0.90, 0.99 | .01     |
| Radiology cost                        | 0.89                                 | 0.84, 0.94 | <.001   |
| <b>Publicly-insured Spanish</b>       |                                      |            |         |
| Total cost                            | 1.34                                 | 1.12, 1.59 | .001    |
| Pharmacy cost                         | 1.57                                 | 1.08, 2.29 | .02     |
| Lab cost                              | 1.17                                 | 0.83, 1.65 | .36     |
| Radiology cost                        | 1.01                                 | 0.60, 1.71 | .96     |
| <b>Publicly-insured Other</b>         |                                      |            |         |
| Total cost                            | 0.95                                 | 0.84, 1.07 | .38     |
| Pharmacy cost                         | 0.83                                 | 0.71, 0.98 | .03     |
| Lab cost                              | 0.83                                 | 0.69, 1.01 | .07     |
| Radiology cost                        | 0.88                                 | 0.69, 1.11 | .27     |

---

<sup>a</sup> Controlling for LOS, race/ethnicity, distance from hospital, medical complexity, asthma diagnosis, age category, insurance type, preferred language, and the interaction between insurance and language.

**Appendix eTable 2:** Adjusted relative ratios and 95% confidence intervals for total costs, stratified by medical complexity, by language and insurance group. Comparison group is privately-insured English speakers.

| Outcome, by language-insurance groups | Adjusted relative ratio <sup>a</sup> | 95% CI     | P-value |
|---------------------------------------|--------------------------------------|------------|---------|
| Privately insured Spanish             |                                      |            |         |
| Non-chronic                           | 0.94                                 | 0.74, 1.21 | .64     |
| Non-complex chronic                   | 0.88                                 | 0.70, 1.12 | .30     |
| Complex chronic                       | 0.77                                 | 0.59, 1.00 | .05     |
| Privately insured Other               |                                      |            |         |
| Non-chronic                           | 0.96                                 | 0.85, 1.09 | .52     |
| Non-complex chronic                   | 0.94                                 | 0.77, 1.14 | .52     |
| Complex chronic                       | 1.12                                 | 0.95, 1.33 | .19     |
| Publicly insured English              |                                      |            |         |
| Non-chronic                           | 0.99                                 | 0.95, 1.03 | .49     |
| Non-complex chronic                   | 0.93                                 | 0.88, 0.98 | .01     |
| Complex chronic                       | 0.93                                 | 0.90, 0.96 | <.001   |
| Publicly insured Spanish              |                                      |            |         |
| Non-chronic                           | 1.04                                 | 0.81, 1.33 | .75     |
| Non-complex chronic                   | 1.13                                 | 0.88, 1.45 | .35     |
| Complex chronic                       | 1.43                                 | 1.06, 1.92 | .02     |
| Publicly insured Other                |                                      |            |         |
| Non-chronic                           | 1.01                                 | 0.87, 1.17 | .90     |
| Non-complex chronic                   | 1.02                                 | 0.81, 1.27 | .89     |
| Complex chronic                       | 0.90                                 | 0.74, 1.10 | .30     |

**Appendix eTable 3:** Adjusted relative ratios and 95% confidence intervals for total costs by language and insurance categories, using different thresholds for winsorization

| Preferred language | Insurance type | Main analysis, winsorized at 99 <sup>th</sup> percentile <sup>a</sup><br>(n=19,249) | Sensitivity analysis, winsorized at 95 <sup>th</sup> percentile <sup>a</sup><br>(n=19,249) |
|--------------------|----------------|-------------------------------------------------------------------------------------|--------------------------------------------------------------------------------------------|
| English            | Public         | 0.93<br>(0.91, 0.96)*                                                               | 0.93<br>(0.90, 0.95)*                                                                      |
|                    | Private        | 0.79<br>(0.67, 0.93)*                                                               | 0.83<br>(0.71, 0.96)*                                                                      |
| Spanish            | Public         | 1.34<br>(1.12, 1.59)*                                                               | 1.22<br>(1.05, 1.42)*                                                                      |
|                    | Private        | 1.05<br>(0.95, 1.17)                                                                | 1.03<br>(0.93, 1.13)                                                                       |
| Other languages    | Public         | 0.95<br>(0.84, 1.07)                                                                | 0.96<br>(0.86, 1.07)                                                                       |

<sup>a</sup>Based on a generalized linear model with log link, gamma family, and clustered on individual, controlling for length of stay (LOS), race/ethnicity, distance from hospital, medical complexity, asthma diagnosis, age category, insurance type, preferred language, and the interaction between insurance and language

\*P < .05
